1 **Fenoxaprop-p-ethyl Susceptibility and Mutation Point Detection of Acetyl-CoA**  
2 **Carboxylase (ACCase) in Different Wild oat (*Avena fatua* L.) Populations from**  
3 **China**

4

5 Jun-jie Liu†, Liuyang Lu†, Bai-zhong Zhang\* Xi-ling Chen\*

6

7 *Henan Institute of Science and Technology, Xinxiang 453003, People's Republic of China*

8

9 *\*Corresponding author: Prof. Xiling Chen, Tel: +86-03733040147, E-mail:*

10 *chenxiling456@126.com, the address of Prof. Chen: Xinxiang Hongqi District, Hualan Road East,*

11 *postal code: 453003; Dr. Baizhong Zhang, E-mail: baizhongzhang@hist.edu.cn, the address of*

12 *Dr. Zhang: Xinxiang Hongqi District, Hualan Road East, postal code: 453003.*

13

14 †These authors contributed equally to this study.

15

16

17

18

19

20

21

22

23

24

25

26

27

28

29

30

31 **Fenoxaprop-p-ethyl susceptibility and mutation point detection of acetyl-coa**  
32 **carboxylase (ACCCase) in different wild oat (*Avena fatua* L.) populations from**  
33 **China**

34 **Abstract**

35 To explore resistant mechanism of wild oat to fenoxaprop-p-ethyl, the susceptibility of  
36 Acetyl-CoA Carboxylase (ACCCase) from 24 wild oat populations to fenoxaprop-p-  
37 ethyl, the level of gene expression, and mutation site of ACCCase were conducted. *In*  
38 *vitro* ACCCase activities were solated and measured by enzyme-linked immunosorbent  
39 assay kit (ELISA) assays, the results indicated that the IC<sub>50</sub> value of the ACCCase of the  
40 most unsusceptible to fenoxaprop-p-ethyl in the wild oat population from Yexian2017  
41 (W24) was 7206.557 -fold compared to that of the ACCCase of most susceptible to  
42 fenoxaprop-p-ethyl in the wild oat population from Queshan (W11). The differential  
43 expression of genes in wild oat treated by the IC<sub>50</sub> fenoxaprop-p-ethyl concentration  
44 (6.9 mg/L) for 24 hours using RNA-seq, digital gene expression (DGE) profiling was  
45 conducted. We found that 8 unigenes annotated as ACCCase genes, 0 up-regulaed  
46 expression and 3 down-regulated expression were observed. The down-regulaed  
47 expressed *ACCCase* was selected for qPCR in the relative susceptible population were  
48 significantly more suppressed than the three relative resistant populations. The  
49 mutations point of ACCCase, Ile-1781-Leu, Trp-1999-Cys, Trp-2027-Cys, Ile-2041-Asn,  
50 Asp-2078-Gly, Cys-2088-Arg published were not found in the populations tested by  
51 multiple sequence alignment with a model complete ACCCase sequence of *Alopecurus*  
52 *myosuroides*. These findings suggest that ACCCase plays a critical role in the  
53 development of wild oat resistance to fenoxaprop-p-ethyl.

54 **Keywords:** *Avena fatua*, Acetyl-coa Carboxylase (ACCCase), fenoxaprop-p-ethyl  
55 resistance, mutation points

56

57 Wild oat (*Avena fatua* L.) also named oat grass, belongs to the Gramineae Avena and  
58 matures one or two years (Christoffers *et al.* 2002). Wild oat is as malignant weeds that  
59 harms wheat, oilseed rape, and other crops in China, and has developed serious  
60 resistance to herbicides all over the world (Cavan *et al.* 2001).

61 At present, wild oat is controlled using chemical herbicides. The herbicide  
62 varieties that effectively control wild oat are few. The only inhibitors are metsulfuron-  
63 methyl and fenoxaprop-p-ethyl. Fenoxaprop-p-ethyl is a kind of  
64 aryloxyphenoxypropionate herbicide (AOPP). Its mode of action is by inhibiting the  
65 activity of acetyl-coenzyme A carboxylase (ACCase) in grassy weeds and then  
66 blocking normal fatty acid synthesis in plants (Devine & Shukla 2000). As a highly  
67 effective herbicide, it has been widely used in wheat fields to prevent grassy weeds,  
68 such as wild oat. However, both long-term and single uses of fenoxaprop-p-ethyl in  
69 wheat fields have caused resistance to wild oat. In addition, fenoxaprop-p-ethyl only  
70 acts on ACCase, so weeds are easily able to develop resistance (Delye 2005).  
71 Fenoxaprop-p-ethyl belongs to the high-risk level in the resistant risk classification, in  
72 which weeds will typically develop resistance after continuous use for a year (Chen  
73 2018; Pornprom 2006). Recently, wild oat had been difficult to control in wheat fields  
74 using only fenoxaprop-p-ethyl. However, the resistance of wild oat to fenoxaprop-p-  
75 ethyl has been seldom reported, especially the resistance mechanism.

76 Carboxylation of acetyl-CoA includes mainly two processes which is involved  
77 with carboxylation of biotin and transfer of carboxylation reaction respectively  
78 (Konishi *et al.* 1996), the ACCases of plants comprise homogeneity (ACCase I) and  
79 heterogeneity (ACCase II), they are both responsible for catalysing acetyl-CoA to  
80 malony-CoA (Schulte *et al.* 1997). Homomeric ACCase localizes in cytosol and it is a  
81 pivotal enzyme to the step of fatty acid synthesis reaction. Heteromeric ACCase used  
82 to be in cytosol, its production malony-CoA is mainly utilized for elongating fatty acid  
83 chain and for synthesizing metabolite associated with flavonoids, resistance-endowing  
84 (Shorrosh *et al.* 1994). However, there are two special cases in cellular distribution of  
85 the two isoenzymes. The first one is that the chloroplast of rape has not only homomeric  
86 ACCase and heteromeric ACCase. The second one is that the ACCases of gramineous  
87 plants are all classified as homogeneity whether they present in cytosol or in plastid  
88 (Sasaki *et al.* 1997).

89 Target-site herbicide resistance (TSR) and non-target-site herbicide resistance  
90 (NTSR) are the main mechanisms of weed resistance to herbicides. TSR involves a

91 target-site mutation that affects the target enzyme sensitivity and results in much lower  
92 or higher expression levels of the target enzyme. Studies of NTSR have mainly included  
93 osmosis, reduced herbicide absorption and conduction, metabolic detoxification,  
94 shielding effects and buffer functioning to increased herbicide resistance herbicide  
95 heightening (Powles *et al.* 1997). ACCase is used as the target of AOPP. Weeds develop  
96 resistance to AOPP mainly due to mutations of ACCase; but the overexpression of  
97 ACCase in weeds also results in the development of resistance to herbicides (Zhang &  
98 Powles 2006). *Sorghum halepense* had developed resistance to enoxaprop-p-ethyl and  
99 sethoxydim due to the overexpression of *ACCase* gene ( Parker *et al.* 1990; Bradley *et*  
100 *al.* 2015).

101 Previous studies of the resistance mechanism to ACCase herbicides in resistant  
102 *Avena* spp. populations revealed that ACCase gene mutation can confer the resistance  
103 to weed frequently (Maneechote *et al.* 1994, 1997; Seefeldt *et al.* 1996; Shukla *et al.*  
104 1997; Cocker *et al.* 2000). Ile-1781-Leu, Trp-1999-Cys, Trp-2027-Cys, Ile-2041-Asn,  
105 Asp-2078-Gly and Cys-2088-Arg are now known mutation sites of ACCase to be  
106 associated with resistance to fenoxaprop-p-ethyl in wild oat (Christoffers *et al.* 2002;  
107 Liu *et al.* 2007; Cruz-Hipolito *et al.* 2011; Beckie *et al.* 2012). Therefore, the  
108 susceptibility of Acetyl-CoA Carboxylase (ACCase) from 24 wild oat populations to  
109 fenoxaprop-p-ethyl, digital gene expression (DGE) profiling, the level of gene  
110 expression, and mutation site of ACCase were conducted in *Avena fatua*. It would  
111 provide a theoretical basis for understanding the molecular mechanisms of weed  
112 resistance.

## 113 MATERIALS AND METHODS

### 114 Seeds of wild oat

115 Seeds of wild oat collected from Henan Province were distributed in Xiangxian  
116 (Xuchang)=W1, Huojia (Xinxiang) =W2, Huixian (Xinxiang) =W3, Wuzhi (Jiaozuo)  
117 =W4, Xiuwu (Jiaozuo) =W5, Xunxian (Hebi)=W6, Fugou (Zhuokou) =W7, Wuyang  
118 (Luohe)=W8, Lankao (Kaifeng)=W9, Heshan (Hebi) =W10, Qeshan  
119 (Zhumadian)=W11, Qixian (Hebi)=W12, Suiyang (Shangqiu)=W13, Zhaoling  
120 (Luohe)=W14, Huaiyang (Zhoukou)=W15, Xihua (Jiaozuo)=W16, Dengfeng

121 (Zhengzhou)=W17, Suiping (Zhumadian)=W18, Linying (Luohe)=W19, Sheqi  
122 (Nanyang)=W20, Xihua (Zhoukou) =W21, Yanling (Xuchang)=W22, Tangyin  
123 (Anyang)=W23, Yexian (Pingdingshan) =W24 in 2017 and Yexian (Pingdingshan) in  
124 2016=W25.

### 125 **Cultivation of seedlings**

126 The greenhouse potting methods of were adopted (Li *et al.* 2010) . The seeds of different  
127 populations of wild oat were sown into pots with a surface area of 75 cm<sup>2</sup>. The soil  
128 surface with the unused herbicide was mixed with a proportion of grass biochar, sifted  
129 and cultured in the greenhouse. Rearing conditions were 20°C in the daytime and 15°C  
130 at night, 75±5% relative humidity, and a 12:12 h light: dark photoperiod. Seeds of wild  
131 oat collected from Henan Province were distributed in 24 populations.

### 132 **Chemicals**

133 The test herbicide fenoxaprop-p-ethyl oil formulation (69%) and the active compound  
134 of fenoxaprop-p-ethyl (95.8%) were supplied by Noposion (Shenzhen, China). Flavine  
135 adenine dinucleotide (FAD), thiamine pyrophosphate (TPP), phenylmethanesulfonyl  
136 fluoride (PMSF), sodium pyruvate (C<sub>3</sub>H<sub>3</sub>NaO<sub>3</sub>), alpha naphthol ( $\alpha$ -naphthol), Tris  
137 (hydroxymethyl) aminomethane hydrochloride (Tris-HCl) and polyvinylpyrrolidone  
138 (PVP) were obtained from Sigma-Aldrich (USA). Creatine (C<sub>4</sub>H<sub>9</sub>N<sub>3</sub>O<sub>2</sub>), sodium  
139 hydroxide (NaOH), Coomassie brilliant blue–G250, monopotassium phosphate  
140 (KH<sub>2</sub>PO<sub>4</sub>), magnesium chloride (MgCl<sub>2</sub>), ethylenediaminetetraacetate acid (EDTA),  
141 and bovine serum albumin (BSA) as well as an ACCase-ELISA kit were purchased  
142 from Beijing Tongzheng Biological Company (China). HiPure Plant RNA Mini Kit,  
143 HiPure Plant DNA Mini Kit and HiPure Gel Pure DNA Mini Kit produced by Magen  
144 were used to isolated total RNA, genomic DNA and purify the production of PCR,  
145 respectively. Taq-Plus PCR Forest Mix(2x) from NOVA (China) was the reagent for  
146 PCR. The kit HiScript<sup>®</sup> II QRT SsuperMix for qPCR and chamQ<sup>™</sup> SYBR<sup>®</sup> qPCR  
147 Master Mix, which are used for cDNA synthesis and qRT-PCR separately, are bought  
148 from company Vazyme (Nanjing, China). Peptone, yeast powder and agar powder  
149 purchased from AOBOX (Beijing, China) were used make LB culture medium. The  
150 Ampicillin purchased from Gentihold (Beijing, China) was applied in *Escherichia coli*

151 transformation experiment as the bacterial inhibitor.

## 152 **Instruments and equipment**

153 An ultraviolet and visible spectrophotometer (UV2102PC, Multi Wavelength  
154 Fluorescence Spectrophotometer, China), refrigerated centrifuge (5417R, Eppendorf,  
155 Germany), and a VMax Microplate Reader (Molecular Devices) with SoftMax Pro 5.4  
156 software were used in the analyses. The primary herbicide sprayer was an atomizer with  
157 an auto spray device (Model: ASP-1098, Spray-head: ST110-01, Pressure: 0.2 MPa).  
158 The PCR program ran in the Analytik Jena Gradient PCR Instrument (9701 series,  
159 Germany) and productions of PCR were validated in the electrophoresis equipment  
160 (Beijin Junyi-dongfang Equipment Co.Ltd, Voltage:100v, time: 20 min). The Bio-Rad  
161 CFX 96 (USA) was used for qPCR. An constant temperature incubator shaker produced  
162 by Jie Rui Er (Jiangsu, China) was used to cultivate *Escherichia coli*.

## 163 **In vitro ACCase susceptibility of different wild oat populations to fenoxaprop-p-** 164 **ethyl**

### 165 **Enzyme preparations**

166 Buffer solution: 100 mmol/L Tris-HCl (pH 8.3), 300 mmol/L glycerinum, 5 mmol/L  
167 DTT, 2 mmol/L EDTA, 0.5 mmol/L PMSF, and 0.01% (v/v) Triton X-100. First, take  
168 3 g of aerial portions at the 3-leaf stage, tear them in pieces and put them into a  
169 prechilled mortar. Grind into a powder in liquid nitrogen, transfer the contents to a 50  
170 mL centrifuge tube, wash the mortar with cold buffer solution in another 50-mL  
171 centrifuge tube and place the tube in the refrigerator at 4°C for two hours. Second,  
172 primary product to be disposed in two steps. First, put the abovementioned homogenate  
173 into a high-speed freezing centrifuge at 4000×g at 4°C for 30 min, discard the sediment,  
174 and then, retain liquid supernatant. Second, continue to centrifuge at 20000×g at 4°C  
175 for 30 min, discard the sediment, and then, retain the liquid supernatant containing the  
176 protein. Transfer the supernatant to a 1.5-mL centrifuge tube to standby for application.  
177 Regarding the sample treatment and requirement of the tissue sample, centrifuge the  
178 sample for 30 min (4000 r/min). Retain the liquid supernatant for immediate  
179 measurement or place it in a -20°C refrigerator for later use. Note that the sample does  
180 not contain NaN<sub>3</sub> because it affects the activity of haptoglobin-related protein (HRP).

## 181 **The ACCase activity of wild oat**

182 The test of the ACCase activity depends on the instruction of the ELISA-ACCcase kit.  
183 The kit is based on the double antibody-sandwich method for testing the ACCcase  
184 activity. The depurated ACCcase antibody is used to parcel the microplate. Prepare a  
185 solid-phase antibody, add the ACCcase to the parcel-antibody microplate in the proper  
186 order, combine with the ACCcase antibody marked by HRP and generate antigen-  
187 antibody-enzyme-labelled antibody compounds. After washing the microplate, add the  
188 substrate TMB to make it change colours. The TMB turns blue under the catalytic  
189 action of the HRP enzyme. The TMB will turn yellow at the end because of the action  
190 of the terminating liquid. The depth of the colour is positive correlated with the  
191 concentration of ACCcase. The spectrophotometric (OD) values are record by a Vmax  
192 microplate reader at a wavelength of 450 nm. The protein content was determined by  
193 the method of Bradford *et al.* (1976) using bovine serum albumin as a standard. ACCcase  
194 activity was expressed as U/mg protein/h. The herbicide was applied at a dose rate of  
195 1, 10, 100, 1000, and 10000 mg/L each sample according to preliminary experiments.  
196 The inhibition rate of ACCcase activity was calculated. The IC<sub>50</sub> values and the  
197 comparative analysis were calculated using a software SPSS 15.0.

## 198 **Fenoxaprop-p-ethyl treatment**

199 A whole-plant assay modified was conducted according to Ryan (1970). Plants thinned  
200 and planted in the field (20 plants per pot) at the 3-leaf stage (20 cm plant height), were  
201 treated with fenoxaprop-*p*-ethyl by atomizing with an auto spray device (Model: ASP-  
202 1098, Spray-head: ST110-01, Pressure: 0.2 MPa). The herbicide was applied at a  
203 concentration of 10 g ai/ha (IC<sub>50</sub>) according to the results of a whole plant assay, the  
204 amount of spouting liquid was 450 L/ha. Water alone was used as a control. Each  
205 treatment was repeated three times. Foliar parts were collected for gene stability  
206 analyses at 24 h after treatment and stored at -80°C for RNA extraction.

## 207 **DGE library preparation and sequencing**

208 A total of 10 3-leaf stage, 5 from the control and 5 from fenoxaprop-*p*-ethyl treated *A.*  
209 *fatua* were collected separately according to the above description, each sample was  
210 prepared as 2 biological replicates. RNA extraction was done using TRIzol kit in

211 according to manufacturer instruction, and DNase I (Promega, Madison, WI) was also  
212 used to remove genomic DNA from the samples. Approximately 30 µg RNA from each  
213 sample was used to construct the DGE libraries, each sample was replicated two times.  
214 The mRNA was treated as described in cDNA library construction and enriched by  
215 PCR amplification. The library products were then ready for sequencing analysis via  
216 Illumina HiseqTM 4000 (Beijing Novogene, Beijing, China) using paired-end  
217 technology (150 bp) in a single run. DGE analysis was performed to obtain a global  
218 view of wild oat transcriptome differences between the control and fenoxaprop-p-ethyl  
219 treated wild oat. To compare differentially expressed genes between the libraries  
220 (fenoxaprop-p-ethyl treatment vs. / the control), the level of gene expression was  
221 determined by normalizing the number of unambiguous tags in each library to reads per  
222 kilobase mapped (RPKM).

### 223 **The effects of fenoxaprop-p-ethyl on the expression of ACCase gene in some** 224 **populations**

225 Relative expression of ACCase gene in 3 resistant populations and 1 susceptible  
226 population (W11) treated by fenoxaprop-p-ethyl at their own IC<sub>50</sub> concentration in 3-  
227 leaf stage were determined. Samples were corrected for qPCR, each treatment was  
228 repeated for 3 times. *18S* was selected as the reference gene (Zhang *et al.* 2018), an  
229 ACCase sequence from RNA-seq of wild oat was used to design primers by primer 3.0  
230 (<http://bioinfo.ut.ee/primer3-0.4.0/>). The primers used were listed in Table 1.

### 231 **RNA extraction and cDNA synthesis**

232 To synthesize cDNA, RNA was isolated using TRIzol reagent (Invitrogen, Carlsbad,  
233 USA) according to the manufacturer's instructions. The concentration and quality of  
234 RNA was test by NanoDrop 2000 (Thermo Scientific, USA). RNA samples with an  
235 A260/A280 ratio ranging from 1.8 to 2.0 and an A260/A230 ratio >2.0 were used for  
236 cDNA synthesis. Total RNA (1µg) was reverse transcribed into First-strand  
237 complementary DNA using a PrimeScript RT reagent kit with gDNA Eraser (Takara,  
238 Dalian, China) according to the manufacturer's instructions and stored at -20°C.

### 239 **Quantitative Real-Time PCR (qPCR)**

240 ROX's Platinum SYBR Green qPCR SuperMix-UDG kit (Invitrogen) was used for



241 qPCR and implementing on an Applied Biosystems 7500 Real-Time PCR system  
242 (Applied Biosystems, Foster City, CA). The reactions were performed in a 20  $\mu$ l  
243 volume of a mixture containing 1  $\mu$ l of cDNA template, 10  $\mu$ l of SYBR Green qPCR  
244 SuperMix-UDG, 0.3  $\mu$ l of each primer, and 8.7  $\mu$ l of nuclease-free water. The  
245 thermocycling program was as follows: 50°C for 2 min, 95°C for 2 min, and 40 cycles  
246 of 95°C for 15 s, and 55°C for 30 s. To acquire a high specificity amplification, a  
247 melting curve analysis between 65 to 95°C, was constructed at the end of each PCR  
248 run. And it based on a 2-fold dilution series of cDNA (1:5, 1:10, 1:10, 1:10, 1:20, and  
249 1:40). The corresponding qPCR efficiencies (E) were calculated refer to the formula  $E =$   
250  $10^{-1/\text{slope}} - 1$  (PFAFFL, 2001; Tellinghuisen 2014; Spiess *et al.* 2015, 2016). Each sample  
251 was prepared as 3 biological replicates, and each reaction was analysed with 2 technical  
252 replications.

### 253 **Mutation point detection**

#### 254 **DNA extraction, PCR amplification, and cloning**

255 cDNA was isolated from 3-leaf stage issue of 1 relative susceptible populations and 7  
256 relative unsusceptible populations using HiPure Plant DNA Mini Kit. 20 plants was  
257 tested in each population selected as mutation point detection. As the complete ACCase  
258 sequence is unknown, so PCR primers was designed from *Alopecurus myosuroides*  
259 (GeneBank accession No. AJ310767) and the region of PCR product in the wild oat  
260 plastidic ACCase carboxyl transferase domain with 5 known and potential ACCase  
261 resistance mutation sites, Ile-1,781- Leu, Trp-1,999-Cys, Trp-2,027-Cys, Ile-2041-Asn,  
262 and Asp-2,078-Gly. The PCR was conducted in 25  $\mu$ L volume that consist of 12.5  $\mu$ L  
263 Taq-Plus PCR Forest Mix(2x) (NOVE, Jiangsu, China), 0.5  $\mu$ L forward primer:  
264 CTGAATGAAGAAGACTATGGTCG, 0.5  $\mu$ L reverse primer:  
265 TCCTCTGACCTGAACTTGATCTC, 1  $\mu$ L DNA, 10.5  $\mu$ L dd H<sub>2</sub>O. The PCR was run  
266 with the following profiles: 94°C for 2 min; 25-35 cycles for 30 sec, 60°C for 30 sec, 72°C  
267 2 min; 72°C 5min. The PCR products was purified from agarose gels using HiPure Gel  
268 Pure DNA Mini Kit. The DNA that it had been purified was connected with pGEM-  
269 Teasy vector by T4 DNA Ligase as follows: 3  $\mu$ L PCR product, 5  $\mu$ L 2  $\times$  T4 Ligase

270 buffer, 1  $\mu$ L pGEM-Teasy vector, 1  $\mu$ L Ligase. All of operations above were on the ice  
271 and the action was at 4°C overnight for the maximum number of transformants.

272 The transformation of ligation product consists mainly of following steps: First,  
273 centrifuging the ligation reactions briefly and adding 2  $\mu$ L of each ligation reaction to  
274 a sterile 1.5 mL tube on ice; Second, placing the competent cells in an ice bath until just  
275 thawed (5 minutes) and mixing cells by gently flicking the tube; Third, transferring  
276 carefully 50  $\mu$ L cells to the ligation reaction tubes from Step 1, then flicking gently the  
277 tubes and incubating on ice for 30 minutes; Fourth, heat-shocking the cells for 45-50  
278 seconds in a water bath at exactly 42°C without shaking and returning immediately the  
279 tubes to ice for 2-3 minutes; Fifth, adding 950  $\mu$ L room temperature liquid LB medium  
280 (without ampicillin) to the ligation reaction transformations and incubating for 1.5  
281 hours at 37°C with shaking (150-200 rpm); Sixth, plating 100  $\mu$ L transformation culture  
282 onto solid duplicate LB/ampicillin/ IPTG/X-Gal plates; Finally, incubating plates  
283 overnight at 37°C.

#### 284 **ACCase gene sequencing and alignment**

285 Selecting white colonies and transferring it into liquid LB medium (including ampicillin)  
286 continue to incubate for 18 hours at 37°C with shaking (220 rpm) , then it was sequenced  
287 by a gene corporation named Beijing Genomic Institute, BGI ( Beijing, China). These  
288 sequences were analysis and alignment using a software, DNAMAN with a model  
289 ACCase sequence (*Alopecurus myosuroides* Gene Bank Accession No. AJ310767) due  
290 to the lack of complete wild oat ACCase sequence (Brown 1990)

#### 291 **Statistical analysis**

292 Statistical and bioassay analyses were performed using Microsoft Excel (2010). IC<sub>50</sub>  
293 values were calculated by SPSS (15.0). Statistical analysis was performed using one-  
294 way analysis of variance and Tukey's test ( $P < 0.05$ ) with InStat Version 3.0 software  
295 (GraphPad Software, San Diego, CA).

## 296 **RESULTS**

### 297 **In vitro ACCase susceptibility of different wild oat populations to fenoxaprop-p-** 298 **ethyl**

299 The effects of fenoxaprop-p-ethyl on ACCase of different wild oat populations is shown

300 in table 2. The results indicate that The most unsusceptible ACCase to fenoxaprop-p-  
301 ethyl was found in the wild oat population from Yexian2017 (W24), its IC<sub>50</sub> value was  
302 8172.236 mg/L, the next unsusceptible ACCase to fenoxaprop-p-ethyl were from  
303 Fugou (W7), W21(Xihua), Huixian (W3) and Linying (W19), their IC<sub>50</sub> values were  
304 7656.177, 5111.930, 3966.196, and 2736.872 mg/L, respectively. The most susceptible  
305 ACCase to fenoxaprop-p-ethyl was found in the wild oat population from Queshan  
306 (W11), its IC<sub>50</sub> value was 1.134 mg/L. The IC<sub>50</sub> of the most unsusceptible ACCase to  
307 fenoxaprop-p-ethyl of wild oat population from Yexian2017 (W24), which was  
308 7206.557-fold greater than that of the most susceptible ACCase to fenoxaprop-p-ethyl  
309 of the wild oat population from Queshan (W11). In addition, the susceptibility of  
310 ACCase to fenoxaprop-p-ethyl of the wild oat from Yexian in 2017 (Pingdingshan) is  
311 less than that in 2016; the IC<sub>50</sub> values were 8172.236 and 1339.554 mg/L, respectively,  
312 with an 6.101-fold difference.

### 313 **In vivo ACCase activity of different wild oat populations**

314 The ACCase activity of different wild oat populations is shown in Fig 1. The ACCase  
315 activity of the wild oat population from Suiyang (W13) was the highest at 3.278 U/h/mg  
316 protein. The next highest ACCase activity were from Zhaoling (W14), Wenxian (W16),  
317 Qixian (W12) and Linying (W19), their ACCase activities were 3.245, 3.234, 3.123 and  
318 3.101 U/h/mg protein, respectively. The ACCase activity of the wild oat population  
319 from Heshan (W10) was the lowest, which was 0.664 U/h/mg protein. Among them,  
320 the highest ACCase activity of wild oat population from Suiyang (W13) was 4.936-fold  
321 that of the lowest population from Heshan (W10). In addition, the ACCase activity of  
322 wild oat from Yexian (Pingdingshan) in 2017 was higher than that in 2016, which were  
323 2.492 and 1.356 U/h/mg protein, respectively, a 1.838-fold difference.

### 324 **Mutation point detection**

325 Eight populations were selected for mutation point detection by multiple sequences  
326 alignment and a complete ACCase sequence from *Alopecurus myosuroides* (Gene Bank  
327 Accession No. AJ310767), which has high homology with wild oat, was used for the  
328 alignment stander. There was no amino acid mutation in six possible sites, it indicated  
329 the resistance from these populations in the assay to fenoxaprop-p-ethyl wasn't caused

330 by the six known amino acid mutations. However, the other sites, Glu-1797-Gly, Thr-  
331 1805-Ser, Pro-1829-Leu, Thr-1833-Ile, Met-1859-Thr, Asp-1904-Gly, Asn-1913-Asp,  
332 Phe-1935-Ser, Gln-2009-Arg, Thr-2092-Ala may be possible amino acid mutations  
333 (Fig 2).

### 334 **Differential expressed ACCase unigenes in wild oat suppressed by fenoxaprop-p-** 335 **ethyl**

336 The differential expression was conducted using RNA-seq, digital gene expression  
337 (DGE) profiling in wild oat treated by the IC<sub>50</sub> fenoxaprop-p-ethyl concentration (6.9  
338 mg/L) for 24 hours. The results showed that 8 unigenes were annotated as ACCase, 0  
339 up-regulated expression and 3 down-regulated expression were observed (Table 3).

### 340 **The effects of fenoxaprop-p-ethyl on the expression of ACCase gene in some** 341 **populations**

342 The expression of ACCase gene in the 3 resistant populations from Huixian (W3),  
343 W21(Xihua), and Yexian2017 (W24), and 1 relative susceptible population from ,  
344 Queshan (W11) treated by fenoxaprop-p-ethyl were conducted. The results indicated  
345 that the expression of ACCase gene from Huixian (W3), Queshan (W11), W21(Xihua),  
346 and Yexian2017 (W24), treated by fenoxaprop-p-ethyl was suppressed by 0.24-, 0.81-,  
347 0.14-, and 0.21-fold (Fig 3).

### 348 **DISCUSSION**

349 Fenoxaprop-p-ethyl is the main ACCase inhibition herbicide used to manage weeds in  
350 wheat fields, some species, i.g. *Alopecurus japonicas*, *Beckmannia syzigachne*, and  
351 *Avena fatua* have developed different levels of resistance to fenoxaprop-p-ethyl  
352 because of its wide usage (Zhang *et al.* 2009; Guo 2011, 2012; Zhang *et al.* 2013; Bi  
353 2013). ACCase is the only target of fenoxaprop-p-ethyl, so the susceptibility of ACCase  
354 in plants to fenoxaprop-p-ethyl *in vitro* or *in vivo* could reflect a relationship between  
355 the plant biotype and its susceptibility to the herbicide. In this study, susceptibility of  
356 ACCase in 24 different populations of wild oat to fenoxaprop-p-ethyl were conducted  
357 *in vitro*. The results indicated that the IC<sub>50</sub> value of the ACCase of the most  
358 unsusceptible to fenoxaprop-p-ethyl in the wild oat population from Yexian2017 (W24)  
359 was 7206.557 -fold compared to that of the ACCase of most susceptible to fenoxaprop-

360 p-ethyl in the wild oat population from Queshan (W11). This indicated that ACCase of  
361 wild oat may play a critical role in the resistance to fenoxaprop-p-ethyl.

362 Point mutations of ACCase may result in resistance of wild oat to the herbicide,  
363 thus six point mutations of ACCase loci published (Christoffers & Berg 2002; Liu *et*  
364 *al.* 2007; Yu *et al.* 2007; Hochberg *et al.* 2009; Kaundun 2010) were determined in the  
365 8 wild oat populations from the 7 relative susceptible and the 1 relative unsusceptible  
366 populations to fenoxaprop-p-ethyl, these genetic loci mutations can lead to the different  
367 levels of resistance. Amino acid mutations in 1999, 2027, 2041 and 2096 loci of the  
368 ACCase of weed species has resulted in resistance to one or more AOPP herbicides but  
369 not to cyclohexanedione (CHD) or phenylpyrazoline (PPZ) herbicides, and amino acid  
370 mutations in 1781, 2078 and 2088 loci of the ACCase of weed species have led to  
371 resistance to all ACCase-inhibiting herbicides (Powles & Yu 2010; Collavo 2011).  
372 However, our results indicated that six published resistance-related amino acid  
373 mutation sites weren't found in the populations tested in the eight wild oat populations.  
374 However, the other sites, Glu-1797-Gly, Thr-1805-Ser, Pro-1829-Leu, Thr-1833-Ile,  
375 Met-1859-Thr, Asp-1904-Gly, Asn-1913-Asp, Phe-1935-Ser, Gln-2009-Arg, Thr-  
376 2092-Ala may be possible amino acid mutations, so the resistance of wild oat to the  
377 herbicide may be caused by other amino sites mutation, ACCase or detoxification  
378 enzymes.

379 The differential expression was conducted using RNA-seq, digital gene expression  
380 (DGE) profiling in wild oat treated by the IC<sub>50</sub> fenoxaprop-p-ethyl concentration (6.9  
381 mg/L) for 24 hours. The results showed that 8 unigenes were annotated as ACCase, 0  
382 up-regulated expression and 3 down-regulated expression were observed. To further  
383 clarify the relationship between ACCase and the wild oat resistance to fenoxaprop-p-  
384 ethyl, the gene expression of ACCase from the 3 resistant populations W21(Xihua),  
385 Huixian (W3), Yexian2017 (W24) and the relative susceptible population Queshan  
386 (W11) treated by fenoxaprop-p-ethyl for 24 hours were conducted. This indicated that  
387 relative expression level of ACCase gene from 3 relative resistant populations and a  
388 relative susceptible population had been suppressed by fenoxaprop-p-ethyl, the  
389 resistant populations were significantly less suppressed than the susceptible populations.

390 This proved that the resistance of wild oat to fenoxaprop-p-ethyl is related to the  
391 expression level of ACCase gene.

## 392 **CONCLUSION**

393 Overexpression of ACCase could play a critical role in the resistance of wild oat to  
394 fenoxaprop-p-ethyl. The six published resistance-related amino acid mutation sites  
395 weren't found in the populations tested in the 8 wild oat populations. Resistance  
396 mechanisms of wild oat still need further validation, such as other point mutation  
397 detection of ACCase, and detoxication enzymes.

## 398 **ACKNOWLEDGEMENTS**

399 The authors are highly obliged to the National Key Research and Development Program  
400 of China (2017YFD0201700), the Key Science and Technology Program of Henan  
401 (Agriculture) (182102110053), the Project of High-level Talent Introduction of Henan  
402 Institute of Science and Technology, China (208010616003), the Scientific and  
403 Technological Innovation of Henan Institute of Science and Technology, China  
404 (208010916005) for the financial support given to the present research work. We thank  
405 Z.Y. Huang for reviewing and improving the manuscript.

## 406 **ADDITIONAL INFORMATION**

407 The sequence information of Accase unigenes is in the Supplementary S1

## 408 **DISCLOSURE STATEMENT**

409 Competing financial interests: The authors declare no competing financial interests.

## 410 **REFERENCES**

- 411 Bi Y. 2013. Resistance of *Alopecurus japonicus* to fenoxaprop-p-ethyl and mesosulfuron-methyl in  
412 winter wheat fields, *Shandong Agricultural University*.
- 413 Bradford M.M.A. 1976. Rapid sensitive method for the quantization of microgram quantities of  
414 protein utilizing the principle of protein binding. *Analytical Biochemistry* **25**, 248-254.
- 415 Bradley K.W., Wu J., Hatzios K.K. and Esjr H. 2015. The mechanism of resistance to  
416 aryloxyphenoxypropionate and cyclohexanedione herbicides in a johnsongrass biotype. *Weed*  
417 *Science* **49**, 477-484.
- 418 Brown H.M. 1990. Mode of action, crop selectivity and soil relations of the sulfonylurea herbicides.  
419 *Pest Management Science* **29**, 263-281.

- 420 Cavan G., Cussans J. and Moss S. 2001. Managing the risks of herbicide resistance in wild oat.  
421 *Weed Science* **49**, 236-240.
- 422 Chen G., Xu H., Zhang T., Bai C. and Dong L. 2018. Fenoxaprop-P-ethyl resistance conferred by  
423 cytochrome P450s and target site mutation in *Alopecurus japonicus*. *Pest Management Science*  
424 **74**. doi.org/10.1002/ps.4863.
- 425 Christoffers M.J., Berg M.L. and Messersmith C.G. 2002. An isoleucine to leucine mutation in  
426 acetyl-CoA carboxylase confers herbicide resistance in wild oat. *Génome* **45**, 1049-1056.
- 427 Cocker K.M., Coleman J.O.D., Blair A.M., Clarke J.H. and Moss S.R. 2000. Biochemical  
428 mechanisms of cross-resistance to aryloxyphenoxypropionate and cyclohexanedione  
429 herbicides in populations of *Avena* spp. *Weed Research* **40**, 323–334.
- 430 Collavo A., Panozzo S., Lucchesi G., Scarabel L. and Sattin M. 2011. Characterisation and  
431 management of phalaris paradoxa resistant to ACCase-inhibitors. *Crop Protection* **30**, 293-299.
- 432 Delye C. 2005. Weed resistance to acetyl coenzyme A carboxylase inhibitors: an update. *Weed*  
433 *Science* **53**, 728-746.
- 434 Devine M.D. and Shukla A. 2000. Altered target sites as a mechanism of herbicide resistance. *Crop*  
435 *Protection* **19**, 881-889.
- 436 Guo F. 2011. The resistance of Japanese foxtail (*Alopecurus japonicus* Steud.) and wild oat (*Avena*  
437 *fatua* L.) to fenoxaprop-p-ethyl and clodinafop-propargyl. *Chinese Academy of Agricultural*  
438 *Sciences*.
- 439 Guo F. 2012. The sensitivity of different wild oat *Avena fatua* populations to fenoxaprop-P-ethyl  
440 and clodinafop-propargyl. *Acta Phytologica Sinica* **39**, 87-90.
- 441 Hochberg O., Sibony M. and Rubin B. 2009. The response of ACCase-resistant *Phalaris paradoxa*  
442 populations involves two different target site mutations. *Weed Research* **49**, 37-46.
- 443 Kaundun S.S. 2010. An aspartate to glycine change in the carboxyl transferase domain of acetyl  
444 CoA carboxylase and non-target-site mechanism (s) confer resistance to ACCase inhibitor  
445 herbicides in a *Lolium multiflorum* population. *Pest Management Science* **66**, 1249-1256.
- 446 Konishi T., Shinohara K., Yamada K. and Sasaki Y. 1996. Acetyl-CoA carboxylase in higher plants:  
447 most plants other than Gramineae have both the prokaryotic and the eukaryotic forms of this  
448 enzyme. *Plant Cell Physiology* **37**, 117–122.
- 449 Li R., Zhang J. and Chen G. 2010. Advance of study on identification of weed herbicide

- 450 resistance. *Chinese Agricultural Science Bulletin* **26**, 289–292.
- 451 Liu J., Li P., Lu L., Xie L., Chen X. and Zhang, B. (2018). Selection and evaluation of potential  
452 reference genes for gene expression analysis in *Avena fatua*. *Plant Protection*  
453 *Science*, *55*(1), 61-71.
- 454 Liu W., Harrison D.K., Chalupska D., Gornicki P., O'Donnell C.C., Adkins S.W., Haselkorn R. and  
455 Williams R.R. 2007. Single-site mutations in the carboxyltransferase domain of plastid acetyl-  
456 coa carboxylase confer resistance to grass-specific herbicides. *Proceedings of the National*  
457 *Academy of Sciences of the United States of America* **104**, 3627-32.
- 458 Liu W., Harrison D.K., Chalupska D., Gornicki P., O'donnell C.C., Adkins S.W., Haselkorn R. and  
459 Williams R.R. 2007. Single-site mutations in the carboxyltransferase domain of plastid acetyl-  
460 CoA carboxylase confer resistance to grass-specific herbicides. *Proceedings of the National*  
461 *Academy of Sciences of the United States of America* **104**, 3627.
- 462 Maneechote C., Holtum J.A.M., Preston C. and Powles S.B. 1994. Resistant Acetyl-CoA  
463 Carboxylase is a Mechanism of Herbicide Resistance in a Biotype of *Avena sterilis* ssp.  
464 ludoviciana. *Plant & Cell Physiology* **35**, 627-635.
- 465 Maneechote C., Preston C. and Powles S.B. 2015. A diclofop - methyl - resistant *Avena sterilis*  
466 biotype with a herbicide - resistant acetyl - coenzyme a carboxylase and enhanced metabolism  
467 of diclofop - methyl. *Pest Management Science* **49**, 105-114.
- 468 Parker W.B., Somers D.A., Wyse D.L., Keith R.A., Burton J.D., Gronwald J.W. and Gengenbach  
469 B.G. 1990. Selection and characterization of sethoxydim- tolerant maize tissue cultures. *Plant*  
470 *Physiology* **92**, 1220-1225.
- 471 Pfaffl M.W. 2001 A new mathematical model for relative quantification in real-time RT-PCR.  
472 *Nucleic Acids Research* **29**, e45.
- 473 Pfaffl M.W., Tichopad A., Prgomet C. and Neuvians T.P. 2004. Determination of stable reference  
474 genes, differentially regulated target genes and sample integrity: BestKeeper--Excel-based tool  
475 using pair-wise correlations. *Biotechnology Letters* **26**, 509–515.
- 476 Pornprom T., Mahatamnuchoke P. and Usui K. 2006. The role of altered acetyl-CoA carboxylase  
477 in conferring resistance to fenoxaprop-P-ethyl in Chinese sprangletop ( *Leptochloa chinensis*,  
478 (L.) Nees). *Pest Management Science* **62**, 1109-1115.
- 479 Powles S.B., Preston C., Bryan I.B. and Jutsum A.R. 1997. Herbicide resistance: impact and



- 480 management. *Advances in Agronomy* **58**, 57–93.
- 481 Powles S.B. and Yu Q. 2010. Evolution in action: plants resistant to herbicides. *Annual Review of*  
482 *Plant Biology* **61**, 317-347.
- 483 Ryan G.F. 1970. Resistance of common groundsel to simazine and atrazine. *Weed Science* **18**, 614–  
484 616.
- 485 Schulte W., Töpfer R., Stracke R. and Martini N. 1997. Multi-functional acetyl-CoA carboxylase  
486 from *Brassica napus* is encoded by a multi-gene family: indication for plastidic localization of  
487 at least one isoform. *Proceedings of the National Academy of Sciences of the United States of*  
488 *America* **94**, 3465-3470.
- 489 Shukla A., Dupont S. and Devine M.D. 1997. Resistance to ACCase-Inhibitor Herbicides in Wild  
490 Oat: Evidence for Target Site-Based Resistance in Two Biotypes from Canada. *Pesticide*  
491 *Biochemistry & Physiology* **57**, 147-155.
- 492 Seefeldt S.S., Fuerst E.P., Gealy D.R., Shukala A., Irzyk G.P. and Devine M.D. 1996. Mechanisms  
493 of resistance to diclofop of two wild oat (*Avena fatua*) biotypes from the Willamette Valley  
494 of Oregon. *Weed Science* **44**, 776–781.
- 495 Spiess A.N., Deutschmann C., Burdukiewicz M., Himmelreich R., Klat K., Schierack P. and  
496 Rödiger S. 2015. Impact of smoothing on parameter estimation in quantitative DNA  
497 amplification experiments. *Clinical Chemistry* **61**, 379–388.
- 498 Spiess A.N., Rödiger S., Burdukiewicz M., Volksdorf T. and Tellinghuisen J. 2016. System-  
499 specific periodicity in quantitative real-time polymerase chain reaction data questions  
500 threshold-based quantitation. *Scientific Reports* **6**, 38951.
- 501 Tellinghuisen J. and Spiess A.N. 2014. Comparing real-time quantitative polymerase chain reaction  
502 analysis methods for precision, linearity, and accuracy of estimating amplification efficiency.  
503 *Analytical Biochemistry* **449**, 76–82.
- 504 Yu Q., Nelson J.K., Zheng M.Q., Jackson M. and Powles S.B. 2007. Molecular characterisation of  
505 resistance to als-inhibiting herbicides in *Hordeum leporinum* biotypes. *Pest Management*  
506 *Science* **63**, 918-927.
- 507 Zhang C.X., Ni H.W., Wei S.H., Huang H.J., Liu Y. and Cui H.L. 2009. Current advances in  
508 research on herbicide resistance. *Scientia Agricultura Sinica* **42**, 1274-1289.
- 509 Zhang C.X., Ni H.W. and Wei S.H. 2013. Herbicide-resistant weeds and their management. *Plant*

510 *Protection* **39**, 99-102.

511 Zhang X.Q. and Powles S.B. 2006. The molecular bases for resistance to acetyl co-enzyme A  
512 carboxylase (ACCase) inhibiting herbicides in two target-based resistant biotypes of annual  
513 ryegrass (*Lolium rigidum*). *Planta* **223**, 550-557.

514 **FIGURE LEGEND**

515 **Figure 1. In vivo ACCase activity of different wild oat populations.**

516 **Figure 2. Alignment of the deduced amino acid sequences of ACCase.**

517 **Figure 3. Relative expression of ACCase gene in three resistant populations**  
518 **compared with a susceptible population.**

519

520

521

522

523

524

525

526

527

528

529

530

531

532

533

534

535

536

537

538

539

540

541

**Table 1. Primer design for qPCR**

| Gene name     | Gene ID             | Sequence (5'-3')        | Tm (°C) | Efficiency (%) | Product Length (bp) | R <sup>2</sup> |
|---------------|---------------------|-------------------------|---------|----------------|---------------------|----------------|
| <i>I8S</i>    | Cluster-32023.48114 | F: TGCACCACCACCCATAGAAT | 59.00   | 97.            | 102                 | 0.998          |
|               |                     | R: CTGCGGCTTAATTTGACCCA | 58.83   | 2              |                     |                |
| <i>ACCase</i> | Cluster-32023.49510 | F: ACCTGCAACCGTGGATTAAG | 59.99   | 99.            | 127                 | 0.999          |
|               |                     | R: AGCTAGAGCAAGCAGCAAGG | 60.06   | 8              |                     |                |

542

543

544

545

546

547

548

549

550

551

552

553

554

555

556

557

558

559

560

561

562

563 **Table 2. The susceptibility of ACCase to fenoxaprop-p-ethyl on different populations of wild**

564

**oat**

| Populations         | SLOPE±S.E  | IC <sub>50</sub> (95% Confidence limit)(mg/L) | X <sup>2</sup> | Degree of freedom | R <sup>2</sup> |
|---------------------|------------|-----------------------------------------------|----------------|-------------------|----------------|
| Xiangxian (W1)      | 0.08±0.016 | 115.315 (24.337-447.658)                      | 7.039          | 13                | 0.971          |
| Huojia (W2)         | 0.07±0.023 | 69.285 (43.449-149.531)                       | 4.050          | 13                | 0.922          |
| Huixian (W3)        | 0.05±0.014 | 3966.196(4511.583-5253.136)                   | 1.573          | 13                | 0.844          |
| Wuzhi (W4)          | 0.12±0.038 | 2.725 (1.716-6.723)                           | 2.889          | 13                | 0.868          |
| Xiuwu (W5)          | 0.09±0.034 | 98.781 (65.103-155.183)                       | 1.282          | 13                | 0.925          |
| Xunxian (W6)        | 0.10±0.040 | 12.065 (7.904-70.572)                         | 3.527          | 13                | 0.965          |
| Fugou (W7)          | 0.07±0.037 | 7656.177 (5962.964- 8554.205)                 | 6.218          | 13                | 0.932          |
| W8(Wuyang)          | 0.13±0.039 | 1.255 (0.986-8.655)                           | 12.939         | 13                | 0.909          |
| W9(Lankao)          | 0.10±0.013 | 1140.105 (1244.703-5456.843)                  | 7.550          | 13                | 0.878          |
| Heshan (W10)        | 0.30±0.018 | 13.805 (5.630-29.448)                         | 16.850         | 13                | 0.969          |
| Queshan (W11)       | 0.17±0.037 | 1.134 (0.525-6.959)                           | 14.761         | 13                | 0.943          |
| Qixian (W12)        | 0.27±0.023 | 36.828 (11.222-83.391)                        | 11.625         | 13                | 0.827          |
| Suiyang (W13)       | 0.20±0.044 | 166.126 (31.72 5-209.475)                     | 2.466          | 13                | 0.925          |
| Zhaoling (W14)      | 0.38±0.032 | 7.140 (2.949-22.873)                          | 31.076         | 13                | 0.939          |
| Huaiyang (W15)      | 0.23±0.065 | 10.797 (2.668-17.5 65)                        | 5.102          | 13                | 0.946          |
| Wenxian (W16)       | 0.11±0.015 | 560.584 (229.352-883.867)                     | 6.978          | 13                | 0.858          |
| Dengfeng (W17)      | 0.16±0.037 | 507.665 (117.969-781.807)                     | 7.065          | 13                | (0.923)        |
| Suiping (W18)       | 0.16±0.030 | 130.537 (83.338-476.601)                      | 5.700          | 13                | 0.991          |
| Linying (W19)       | 0.10±0.024 | 2736.872 (1454.222-2563.884)                  | 0.819          | 13                | 0.927          |
| Sheqi (W20)         | 0.08±0.032 | 133.274 (50.615-186.894)                      | 20.564         | 13                | 0.937          |
| W21(Xihua)          | 0.21±0.064 | 5111.930 (4495.158-5918.343)                  | 4.998          | 13                | 0.908          |
| Yanling (W22)       | 0.13±0.045 | 166.984 (105.604-372.714)                     | 32.600         | 13                | 0.939          |
| Tangyin (W23)       | 0.05±0.013 | 400.835 (186.5252-638.301)                    | 3.640          | 13                | 0.901          |
| Yexian2017<br>(W24) | 0.06±0.020 | 8172.236 (6454.222-9591.452)                  | 2.109          | 13                | 0.901          |
| Yexian2016<br>(W25) | 0.08±0.019 | 1339.554 (807.785-1800.296)                   | 1.792          | 13                | 0.992          |

565

566 **Table 3. Differential expressed ACCase unigenes in wild oat suppressed by fenoxaprop-p-**  
567 **ethyl**

| Gene ID             | FTvsCK.log2.<br>(Fold change). | Similarity<br>organisms | Query<br>cover<br>% | E value | Accession      |
|---------------------|--------------------------------|-------------------------|---------------------|---------|----------------|
| Cluster-32023.23305 | -1.0028                        | <i>T. aestivum</i>      | 21                  | 1e-16   | EU660892.1     |
| Cluster-22064.0     | -0.0028251                     | <i>X. granatum</i>      | 100                 | 4e-155  | LC217858.1     |
| Cluster-32023.20930 | -2.0028                        | <i>T. aestivum</i>      | 66                  | 2e-84   | EU660895.1     |
| Cluster-32023.63937 | -0.56424                       | <i>T. aestivum</i>      | 63                  | 9e-71   | EU660895.1     |
| Cluster-32023.46997 | 0.5603                         | <i>A. tauschii</i>      | 77                  | 0.0     | XM_020312452.1 |
| Cluster-32023.62340 | -0.1636                        | <i>A. tauschii</i>      | 96                  | 0       | EU660897.1     |
| Cluster-32023.48393 | 0.45485                        | <i>A. myosuroides</i>   | 89                  | 0       | AJ632096.1     |
| Cluster-32023.49510 | -1.43894                       | <i>A. myosuroides</i>   | 97                  | 0       | AJ310767.1     |

568 Note: Fold Change (FC) = RPKM of neonicotinoid or sulfoxaflor treated samples/RPKM of untreated samples.

569 RPKM: Reads per kilo bases per million reads.

570 FDR  $\leq$  0.001 and the absolute value of  $\text{Log}_2^{\text{FC}} \geq 1$  were used as thresholds to judge the significance of differences

571 in gene expression.

572

573

574

575

576

577

578

579

580

581

582

583

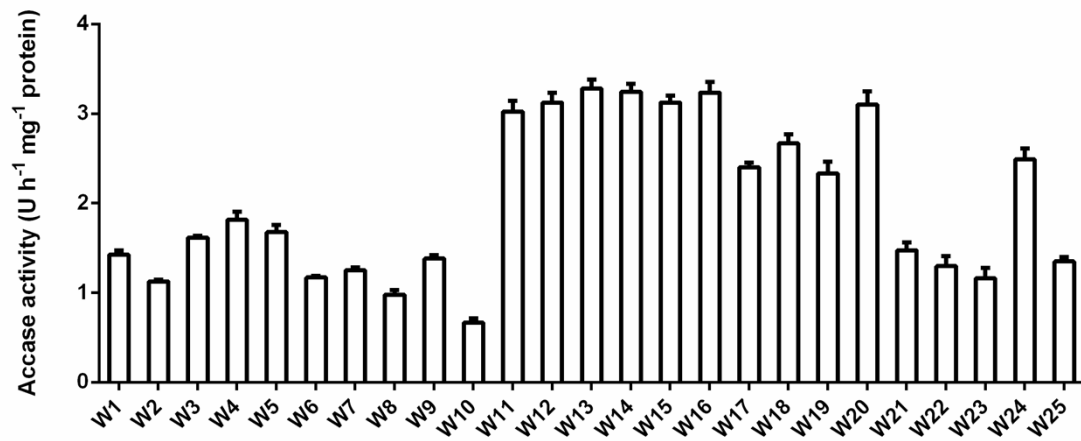

Fig. 1. *In vivo* ACCase activity of different wild oat populations.

584

585

586

587

588

589

590

591

592

593

594

595

596

597

598

599

600

601

602

603

604

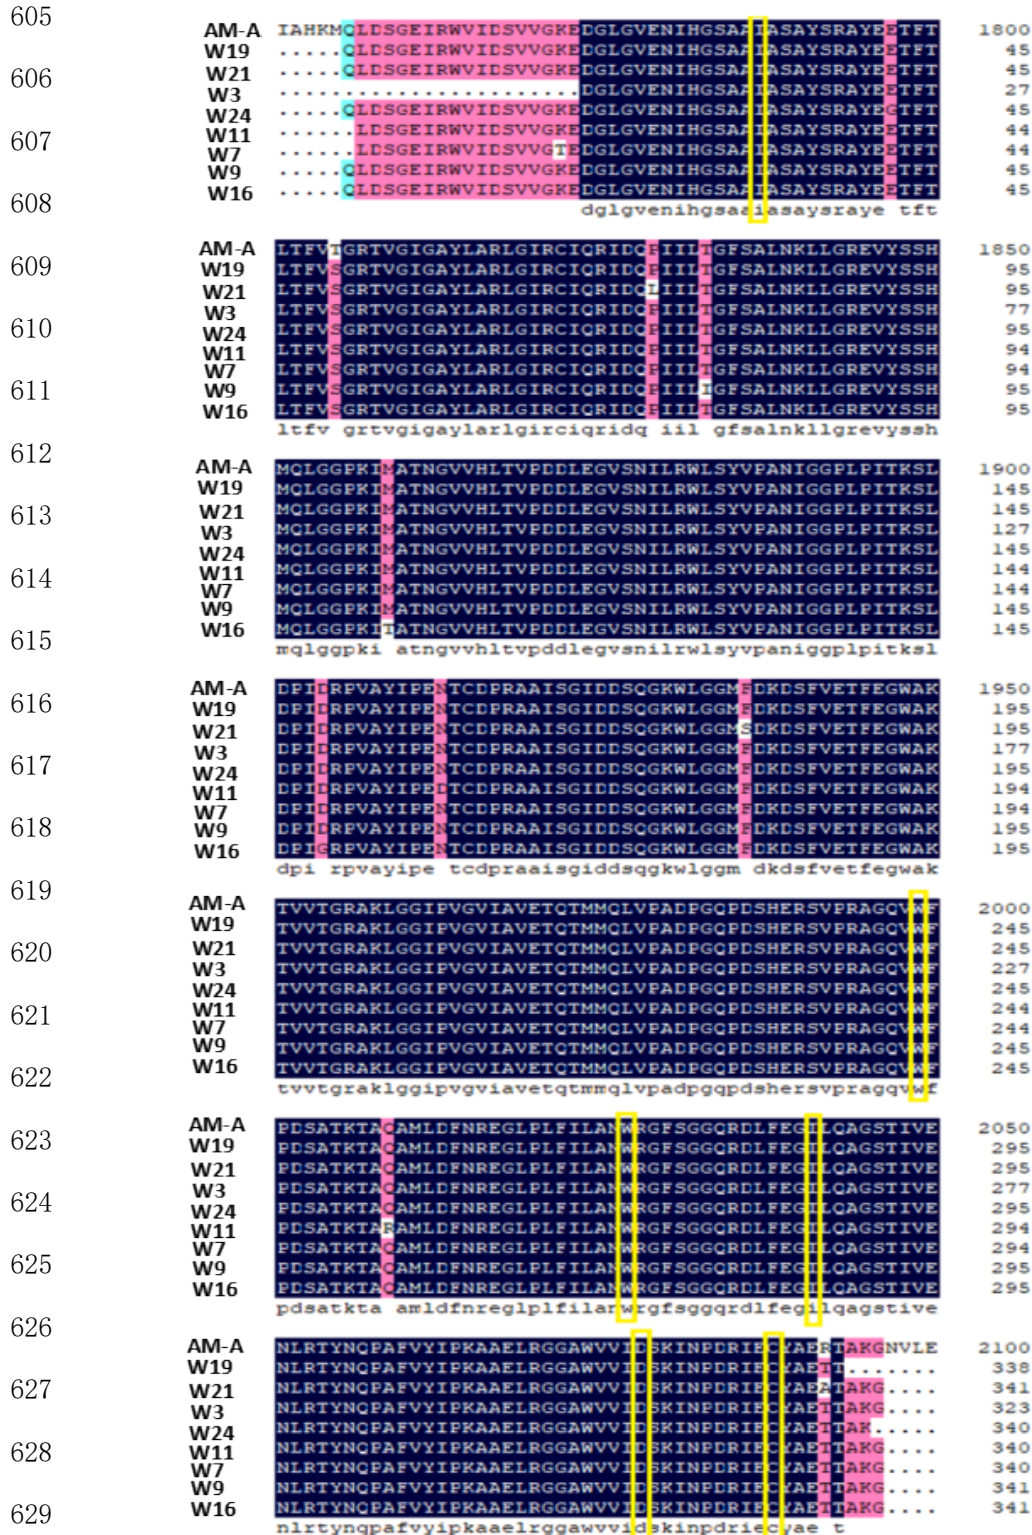

631 **Fig. 2. Alignment of the deduced amino acid sequences of ACCase.** Yellow frames represent that six possible  
632 amino acid mutation site which had been published. AM-A means model ACCase sequence (*Alopecurus*  
633 *myosuroides*). W11 is most susceptible population, the other 7 are relative resistant.  
634

635

636

637

638

639

640

641

642

643

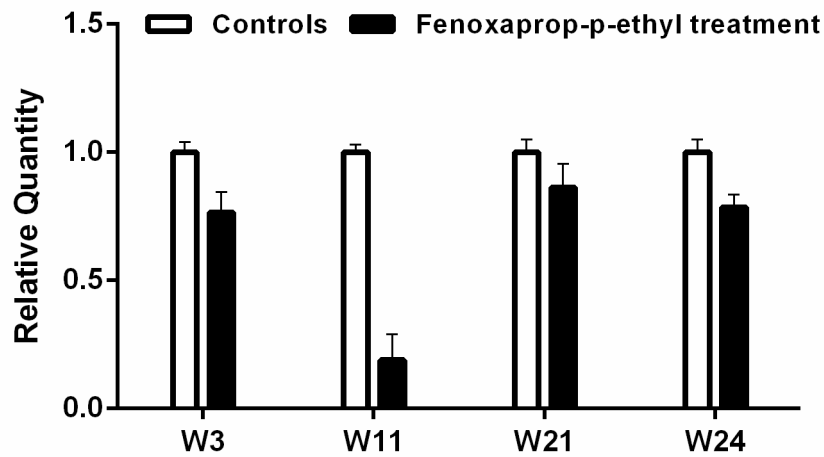

644

645 **Fig. 3. Relative expression of ACCase gene in three resistant populations and a susceptible population (W11).**

646 This four typical populations were treated by fenoxaprop-p-ethyl in 3-leaf stage and compared with the control. Date

647 are means  $\pm$  standard error (S.E) of three replicates, and the actin gene was used as a reference gene. The relative

648 expression was calculated using  $2^{-\Delta\Delta C_t}$  method base on the value of the control expression, which was ascribed an

649 arbitrary value of 1. W11 is most susceptible population, the other 3 are relative resistant.

650

651

652

653

654

655

656

657

658

659

660

661

662

663

664
